# Supplementary material
Source: Research Square preprint supplement (doi:10.21203/rs.3.rs-9587066/v1)
Supplement: Supplementary file 1 [file 0f0dac9e1c9b7ca706c3fdf0.docx]

Supplementary Figure S1. Haplotype heatmaps across increasing numbers of SNPs (10, 20, 50, 100, 200, 500) show consistent genetic separation between red- and white-flesh dragon fruit.

Samples are grouped by phenotype (red-flesh on top, white-flesh on bottom). Each panel uses identical color scale for ALT allele count (0–2).

Supplementary Figure S2. PCA plots of 34 dragon fruit accessions based on six core SNP panels (10, 20, 50, 100, 200, 500 SNPs).

Red = red-flesh, cyan = white-flesh. Ellipses highlight clusters; PC1 explains >93% variance in all cases, showing consistent genetic separation across SNP panel sizes.

Supplementary Figure S3. Haplotype heatmaps of 34 dragon fruit accessions across six hierarchical core SNP panels (10, 20, 50, 100, 200, and 500 SNPs). Samples are ordered by flesh color phenotype: red-flesh (top) and white-flesh (bottom). Each cell represents the number of alternative alleles (0–2) at a given locus.

Supplementary Figure S4. Principal component analysis (PCA) of the 26 red and 12 white dragon fruit accessions using increasing numbers of flesh color-associated SNPs (5, 10, 50, and 437).

Supplementary Table S1. Primer sequences for the 10 ultra-core SNPs used in validation.

Forward and reverse primers are listed with expected product sizes. All genotyping was performed via PCR-Sanger sequencing.

Supplementary Table S2. Summary of sequencing quality and alignment metrics for each sample.

Q30 indicates the percentage of bases with Phred quality ≥30; Mapped% refers to total reads aligned to the reference genome; Properly mapped% denotes reads with correct pair orientation (for paired-end data).

Supplementary Table S3. Summary of SLAF tag statistics across samples.

SLAF num = number of unique SLAF tags per sample; Total depth = sum of read depths across all SLAFs; Average depth = mean coverage per SLAF tag.

Supplementary Table S4. Summary of SNP detection statistics per sample.

SNP num = number of detected SNPs; Integrity = proportion of SNPs with genotype calls in ≥90% of samples; Heter ratio = percentage of heterozygous SNPs among called variants.

Supplementary Table S5. Genotypes at the 10 ultra-core SNP loci in the discovery panel.

Supplementary Table S6. Correlation coefficients of four candidate genes with key betalain biosynthesis genes .

Supplementary Table S6. Pearson correlation coefficients (r) between four candidate genes and two key betalain biosynthesis genes (*CYP76AD1-1* and *DODA1*) across four developmental stages of red-fleshed dragon fruit.
