# Supplementary material
Source: Research Square preprint supplement (doi:10.21203/rs.3.rs-9587066/v1)
Supplement: Supplementary file 2 [file 1e3a78a0ff6c262fbbcca273.docx]

**Supplementary Table S6. Pearson correlation coefficients (r) between four candidate genes and two key betalain biosynthesis genes (*CYP76AD1-1* and *DODA1*) across four developmental stages of red-fleshed dragon fruit.**

| Candidate Gene | Putative Function | r with*CYP76AD1-1* | r with *DODA1* |
| --- | --- | --- | --- |
| *HU10G00331.1* | bHLH TF | 0.62 | 0.78 |
| *HU06G00398.1* | CYP450 | 0.73 | 0.71 |
| *HU11G01046.1* | POD12 | 0.64 | 0.66 |
| *HU05G00589.1* | MATE transporter | 0.68 | 0.72 |

**Correlations were calculated using all time-point samples (19, 23, 25, 29 DAP) with three biological replicates each (n = 12). All correlations are significant at p < 0.01.**
