# Supplementary material
Source: Research Square preprint supplement (doi:10.21203/rs.3.rs-9587066/v1)
Supplement: Supplementary file 3 [file 8e25355896e4948320f10faa.docx]

Supplementary Table S4. Summary of SNP detection statistics per sample.

| Sample ID | SNP num | Integrity | Heter ratio |
| --- | --- | --- | --- |
| CXYH | 3079658 | 57.36% | 9.77% |
| DGXL | 2640110 | 49.18% | 11.78% |
| DH | 2930763 | 54.59% | 12.78% |
| DH2 | 2369700 | 44.14% | 10.95% |
| DQEH | 2783900 | 51.85% | 11.96% |
| FR | 2862500 | 53.32% | 10.52% |
| FSH | 2745609 | 51.14% | 12.16% |
| GBSJ | 3361287 | 62.61% | 14.32% |
| GFHL | 2785210 | 51.88% | 10.91% |
| GHB | 3084899 | 57.46% | 5.84% |
| GHL1 | 3307810 | 61.61% | 14.32% |
| GXDH | 2769656 | 51.59% | 12.16% |
| GXFR | 2824832 | 52.62% | 10.35% |
| GZHL | 2895443 | 53.93% | 5.93% |
| HBSS | 2936952 | 54.70% | 6.02% |
| HFJR | 2860546 | 53.28% | 9.80% |
| HHDG | 2477907 | 46.15% | 11.85% |
| HHDK | 2438934 | 45.43% | 11.32% |
| HLG | 2591985 | 48.28% | 13.66% |
| HQL | 2645265 | 49.27% | 15.12% |
| HSJ | 3447157 | 64.21% | 14.80% |
| HJ | 2652766 | 49.41% | 5.40% |
| JDYH | 2814915 | 52.43% | 11.90% |
| JML | 2811542 | 52.37% | 12.00% |
| LHDG | 2560637 | 47.70% | 11.27% |
| LHH | 2471883 | 46.04% | 10.77% |
| MLG | 2882420 | 53.69% | 12.01% |
| PB | 2994074 | 55.77% | 12.56% |
| QLTH | 2403332 | 44.77% | 9.50% |
| QP | 2615952 | 48.73% | 12.06% |
| RZDH | 3003127 | 55.94% | 12.61% |
| SHQ | 3129265 | 58.29% | 12.67% |
| TNSH | 3049449 | 56.80% | 12.56% |
| WC | 3134629 | 58.39% | 10.95% |
| WCHL | 2586607 | 48.18% | 6.23% |
| XJTY | 2515535 | 46.86% | 9.84% |
| XJYQ | 2723321 | 50.73% | 11.93% |
| XLSJ | 2296064 | 42.77% | 7.74% |
| XMEH | 3009926 | 56.06% | 12.62% |
| XMYH | 3234161 | 60.24% | 11.48% |
| YGBR | 3071006 | 57.20% | 6.19% |
| YH3 | 2693962 | 50.18% | 10.23% |
| YWG | 2400820 | 44.72% | 11.17% |
| YXX | 3137930 | 58.45% | 14.03% |
| ZL | 2776826 | 51.72% | 11.68% |

Note: SNP num = number of detected SNPs; Integrity = proportion of SNPs with genotype calls in ≥90% of samples; Heter ratio = percentage of heterozygous SNPs among called variants.
