# Supplementary material
Source: Research Square preprint supplement (doi:10.21203/rs.3.rs-9587066/v1)
Supplement: Supplementary file 4 [file 9f21d4101724785882790aa1.docx]

Table S5A. Genotypes at the 10 ultra-core SNP loci in the discovery panel (samples 1–15).

| SNP ID | Ref/Alt | DGXL | DH | DH2 | DQEH | FSH | GFHL | GHL1 | GXDH | GXFR | JDYH | JML | LHH | MLG | RZDH | SHQ |
| --- | --- | --- | --- | --- | --- | --- | --- | --- | --- | --- | --- | --- | --- | --- | --- | --- |
| SNP1 | A/T | 2 | 2 | 2 | 1 | 2 | 2 | 2 | 2 | 2 | 2 | 2 | 2 | 2 | 2 | 2 |
| SNP2 | G/A | 2 | 2 | 2 | 2 | 2 | 2 | 2 | 2 | 2 | 2 | 2 | 2 | 2 | 2 | 2 |
| SNP3 | A/G | 2 | 2 | 2 | 2 | 2 | 2 | 2 | 2 | 2 | 2 | 2 | 2 | 2 | 2 | 2 |
| SNP4 | A/G | 2 | 2 | 2 | 2 | 2 | 2 | 2 | 2 | 2 | 2 | 2 | 2 | 2 | 2 | 2 |
| SNP5 | T/C | 2 | 2 | 2 | 2 | 2 | 2 | 2 | 2 | 2 | 2 | 2 | 2 | 2 | 2 | 2 |
| SNP6 | G/A | 2 | 2 | 2 | 2 | 2 | 2 | 2 | 2 | 2 | 2 | 2 | 2 | 2 | 2 | 2 |
| SNP7 | G/A | 2 | 2 | 2 | 2 | 2 | 2 | 2 | 2 | 2 | 1 | 2 | 2 | 2 | 2 | 2 |
| SNP8 | G/A | 2 | 2 | 2 | 2 | 2 | 2 | 2 | 2 | 2 | 2 | 2 | 2 | 2 | 2 | 2 |
| SNP9 | C/T | 2 | 2 | 2 | 2 | 2 | 2 | 2 | 2 | 2 | 2 | 2 | 2 | 2 | 2 | 2 |
| SNP10 | T/G | 2 | 2 | 2 | 2 | 2 | 2 | 2 | 2 | 2 | 2 | 2 | 2 | 2 | 2 | 2 |

Note: "Ref/Alt" denotes the reference and alternative alleles, respectively. Genotype codes: 0 = homozygous reference (Ref/Ref), 1 = heterozygous (Ref/Alt), 2 = homozygous alternative (Alt/Alt). All samples were genotyped via SLAF-seq. This table includes the first 15 accessions of the 45-sample discovery panel. SNP IDs correspond to the following genomic positions and alleles:

SNP1, chr04:101320703, A/T;

SNP2, chr05:27106429, G/A;

SNP3, chr05:81783223, A/G;

SNP4, chr07:35138978, A/G;

SNP5, chr07:56371701, T/C;

SNP6, chr07:58485677, G/A;

SNP7, chr07:113215963, G/A;

SNP8, chr08:71145652, G/A;

SNP9, chr09:60199790, C/T;

SNP10, chr11:43495628, T/G.

Table S5B. Genotypes at the 10 ultra-core SNP loci in the discovery panel (samples 16–30).

| SNP ID | Ref/Alt | TNSH | XJYQ | XMEH | YXX | ZL | CXYH | GBSJ | GHB | GZHL | HBSS | HLG | HZ | QP | WC | WCHL |
| --- | --- | --- | --- | --- | --- | --- | --- | --- | --- | --- | --- | --- | --- | --- | --- | --- |
| SNP1 | A/T | 1 | 2 | 2 | 2 | 2 | 0 | 0 | 0 | 0 | 0 | 1 | 0 | 0 | 0 | 0 |
| SNP2 | G/A | 2 | 2 | 2 | 2 | 2 | 0 | 0 | 0 | 0 | 0 | 0 | 0 | 0 | 0 | 0 |
| SNP3 | A/G | 2 | 2 | 2 | 2 | 2 | 0 | 0 | 0 | 0 | 0 | 0 | 0 | 0 | 0 | 0 |
| SNP4 | A/G | 2 | 2 | 2 | 2 | 2 | 0 | 0 | 0 | 1 | 0 | 0 | 0 | 0 | 0 | 0 |
| SNP5 | T/C | 2 | 2 | 2 | 2 | 2 | 0 | 0 | 0 | 0 | 0 | 0 | 0 | 0 | 0 | 0 |
| SNP6 | G/A | 2 | 2 | 2 | 2 | 2 | 0 | 0 | 0 | 1 | 0 | 0 | 0 | 0 | 0 | 0 |
| SNP7 | G/A | 2 | 2 | 2 | 2 | 2 | 0 | 0 | 0 | 0 | 0 | 1 | 0 | 0 | 0 | 0 |
| SNP8 | G/A | 2 | 2 | 2 | 1 | 2 | 0 | 0 | 0 | 0 | 0 | 0 | 0 | 0 | 0 | 0 |
| SNP9 | C/T | 2 | 2 | 2 | 2 | 2 | 0 | 0 | 0 | 0 | 1 | 0 | 0 | 0 | 0 | 0 |
| SNP10 | T/G | 2 | 2 | 2 | 2 | 2 | 0 | 0 | 0 | 0 | 0 | 0 | 0 | 0 | 0 | 0 |

Continued from Table S5A. Same SNP ID definitions apply.

Table S5C

| SNP ID | Ref/Alt | XLSJ | XMYH | YGBR | YWG | HFJR | HHDG | HQL | HSJ | PB | QLTH | FR | HHDK | LHDG | XJTY | YH3 |
| --- | --- | --- | --- | --- | --- | --- | --- | --- | --- | --- | --- | --- | --- | --- | --- | --- |
| SNP1 | A/T | 0 | 0 | 0 | 0 | 2 | 2 | 1 | 2 | 0 | 0 | 0 | 0 | 0 | 0 | 1 |
| SNP2 | G/A | 0 | 0 | 0 | 0 | 0 | 1 | 2 | 1 | 0 | 2 | 0 | 0 | 1 | 1 | 0 |
| SNP3 | A/G | 0 | 0 | 0 | 0 | 0 | 1 | 1 | 2 | 2 | 1 | 0 | 0 | 0 | 0 | 2 |
| SNP4 | A/G | 0 | 0 | 0 | 0 | 2 | 0 | 0 | 2 | 0 | 0 | 0 | 0 | 0 | 0 | 0 |
| SNP5 | T/C | 0 | 0 | 0 | 0 | 2 | 2 | 0 | 1 | 2 | 0 | 0 | 1 | 0 | 1 | 0 |
| SNP6 | G/A | 0 | 0 | 0 | 0 | 2 | 2 | 2 | 1 | 2 | 1 | 1 | 2 | 2 | 0 | 1 |
| SNP7 | G/A | 0 | 0 | 0 | 0 | 2 | 2 | 1 | 1 | 0 | 1 | 0 | 2 | 1 | 0 | 0 |
| SNP8 | G/A | 0 | 0 | 0 | 0 | 0 | 1 | 1 | 2 | 2 | 2 | 2 | 1 | 0 | 2 | 2 |
| SNP9 | C/T | 0 | 0 | 0 | 0 | 2 | 2 | 1 | 1 | 2 | 1 | 2 | 0 | 0 | 2 | 1 |
| SNP10 | T/G | 0 | 0 | 0 | 0 | 2 | 1 | 0 | 1 | 0 | 0 | 0 | 0 | 0 | 0 | 0 |

Continued from Table S5A. Same SNP ID definitions apply.
