# Supplementary material
Source: Research Square preprint supplement (doi:10.21203/rs.3.rs-9587066/v1)
Supplement: Supplementary file 5 [file afe89c7699b28e5a2255dc61.docx]

Supplementary Table S3. Summary of SLAF tag statistics across samples.

| Sample ID | SLAF number | Total depth | Average depth |
| --- | --- | --- | --- |
| Total | 643349 | 107003722 | 166.323 |
| CXYH | 253805 | 3432447 | 13.524 |
| DGXL | 204658 | 1545359 | 7.5509 |
| DH | 248347 | 2390082 | 9.624 |
| DH2 | 181157 | 1279685 | 7.064 |
| DQEH | 217343 | 1775487 | 8.1691 |
| FR | 235421 | 2789250 | 11.8479 |
| FSH | 213939 | 1816540 | 8.4909 |
| GBSJ | 291470 | 5326429 | 18.2744 |
| GFHL | 220329 | 2005627 | 9.1029 |
| GHB | 266670 | 4195830 | 15.7342 |
| GHL1 | 283517 | 3792299 | 13.3759 |
| GXDH | 215806 | 1785291 | 8.2727 |
| GXFR | 234035 | 1871841 | 7.9981 |
| GZHL | 241837 | 3459329 | 14.3044 |
| HBSS | 250188 | 3549400 | 14.1869 |
| HFJR | 230690 | 2177736 | 9.4401 |
| HHDG | 182581 | 1289363 | 7.0619 |
| HHDK | 181321 | 1298663 | 7.1622 |
| HLG | 198489 | 2293179 | 11.5532 |
| HQL | 204072 | 1847324 | 9.0523 |
| HSJ | 285982 | 5089680 | 17.7972 |
| HJ | 223431 | 2592252 | 11.602 |
| JDYH | 219373 | 1562221 | 7.1213 |
| JML | 218946 | 1851591 | 8.4568 |
| LHDG | 190276 | 1574869 | 8.2768 |
| LHH | 188862 | 1029531 | 5.4512 |
| MLG | 225183 | 1539865 | 6.8383 |
| PB | 243861 | 2940364 | 12.0575 |
| QLTH | 182755 | 1480266 | 8.0997 |
| QP | 194392 | 1638434 | 8.4285 |
| RZDH | 240019 | 2251408 | 9.3801 |
| SHQ | 268507 | 2244231 | 8.3582 |
| TNSH | 240548 | 1962816 | 8.1598 |
| WC | 265600 | 3821634 | 14.3887 |
| WCHL | 207334 | 2155155 | 10.3946 |
| XJTY | 197925 | 1645727 | 8.3149 |
| XJYQ | 213580 | 1942467 | 9.0948 |
| XLSJ | 181707 | 1331385 | 7.3271 |
| XMEH | 243243 | 2438863 | 10.0264 |
| XMYH | 271969 | 4172353 | 15.3413 |
| YGBR | 260373 | 3904815 | 14.997 |
| YH3 | 213857 | 2129354 | 9.9569 |
| YWG | 170949 | 2223932 | 13.0093 |
| YXX | 268452 | 2143754 | 7.9856 |
| ZL | 217143 | 1415594 | 6.5192 |

Note: SLAF num = number of unique SLAF tags per sample; Total depth = sum of read depths across all SLAFs; Average depth = mean coverage per SLAF tag.
