# Supplementary material
Source: Research Square preprint supplement (doi:10.21203/rs.3.rs-9587066/v1)
Supplement: Supplementary file 6 [file b41bed6bc3e7070ff347b33a.docx]

Supplementary Table S1. Primer sequences for the 10 ultra-core SNPs used in validation.

| #CHROM | POS | REF | ALT | Forward Primer | Reverse Primer | Product Size |
| --- | --- | --- | --- | --- | --- | --- |
| chr04 | 101320703 | A | T | GGCTGAGGAAGAGTTACGG | AGTGGAGACGGGGATGG | 308 |
| chr05 | 27106429 | G | A | CGCATTTAGGAAAGGGAG | CCATTCTTGATTTGGCATT | 295 |
| chr05 | 81783223 | A | G | GGCTGGGCTTCCTTACTG | CCTCGGTGCTATGAAAATG | 393 |
| chr07 | 35138978 | A | G | TTTTATGTTATTTCGCTCTGTAC | TTTCTCCTGAAGTTGTCGG | 194 |
| chr07 | 56371701 | T | C | GCCTTATTTTGACAACTACGA | AGCAGCAATGTGGGGTG | 493 |
| chr07 | 58485677 | G | A | TCCCTGGAAGAAGACAACA | TGAGCCAAAATAACTTAGATGAG | 255 |
| chr07 | 113215963 | G | A | GCGGAGCTATGTTATGGG | TTCTTCACTTCTATGTTTTGGAT | 298 |
| chr08 | 71145652 | G | A | TGCCAAATGGGTAGAGTTC | CACAGTTTGTTCCCCTTGA | 254 |
| chr09 | 60199790 | C | T | TATTACATTTGAGGTGGAAGG | TTAGGTGGCATAGGAGCAG | 222 |
| chr11 | 43495628 | T | G | CTTCATAATACGTCTTCTATCCAAAT | GGTCTCGGGCATCCACT | 316 |
