# Supplementary material
Source: Research Square preprint supplement (doi:10.21203/rs.3.rs-9587066/v1)
Supplement: Supplementary file 7 [file d7666e25b6112a87d67a92c1.docx]

Supplementary Table S2. Summary of sequencing quality and alignment metrics for each sample.

| Sample ID | Total Reads | GC(%) | Q30(%) | Mapped(%) | Properly mapped(%) |
| --- | --- | --- | --- | --- | --- |
| CXYH | 7648334 | 40.19 | 92.44 | 99.14 | 91.27 |
| DGXL | 3685576 | 40.97 | 91.82 | 98.28 | 85.84 |
| DH | 5579658 | 39.89 | 89.79 | 97.67 | 88.51 |
| DH2 | 2991712 | 40.57 | 92.15 | 98.23 | 86.82 |
| DQEH | 4160142 | 40.63 | 93.37 | 98.61 | 87.05 |
| FR | 6333254 | 40.11 | 90.05 | 98.07 | 89.49 |
| FSH | 4272250 | 40.85 | 92.44 | 98.43 | 86.91 |
| GBSJ | 12363790 | 39.79 | 92.49 | 97.35 | 87.56 |
| GFHL | 4727438 | 40.81 | 92.51 | 98.7 | 86.34 |
| GHB | 9094526 | 40.24 | 91.86 | 99.42 | 94.16 |
| GHL1 | 8589044 | 40.01 | 92.87 | 98.52 | 90.15 |
| GXDH | 4209782 | 41.73 | 92.66 | 98.62 | 86.82 |
| GXFR | 4319864 | 41 | 89.64 | 98.4 | 90.24 |
| GZHL | 7614120 | 40.24 | 92.25 | 98.89 | 92.26 |
| HBSS | 7735736 | 40.37 | 92.09 | 99.36 | 93.67 |
| HFJR | 5033012 | 40.72 | 92.08 | 98.64 | 88.18 |
| HHDG | 3190654 | 40.97 | 92.18 | 98.21 | 83.24 |
| HHDK | 3174850 | 41.08 | 92.21 | 98.36 | 84.17 |
| HLG | 5888790 | 40.9 | 91.97 | 96.24 | 79.83 |
| HQL | 4802166 | 40.31 | 89.67 | 97.15 | 79.56 |
| HSJ | 11758428 | 39.8 | 92.01 | 98.28 | 88.08 |
| HJ | 5722862 | 40.06 | 92.55 | 99.36 | 92.51 |
| JDYH | 3819298 | 41.67 | 93.97 | 98.52 | 84.03 |
| JML | 4421262 | 41.23 | 92.68 | 98.55 | 85.45 |
| LHDG | 3801682 | 41.35 | 91.55 | 98.05 | 84.94 |
| LHH | 2540192 | 41.78 | 93.98 | 98.42 | 83.59 |
| MLG | 3774754 | 41.77 | 94.23 | 98.71 | 84.12 |
| PB | 6682344 | 40.47 | 92.29 | 98.51 | 89.72 |
| QLTH | 3564884 | 41.36 | 91.76 | 98.39 | 85.15 |
| QP | 4060164 | 40.73 | 92.95 | 97.86 | 82.61 |
| RZDH | 5210774 | 40.61 | 93.31 | 98.46 | 87.95 |
| SHQ | 5212946 | 40.59 | 89.03 | 98.2 | 90.18 |
| TNSH | 4804896 | 41.62 | 94.16 | 98.36 | 83.98 |
| WC | 8492218 | 39.87 | 92.24 | 98.8 | 91.5 |
| WCHL | 4877264 | 40.7 | 92.15 | 99.31 | 90.41 |
| XJTY | 3910344 | 40.88 | 91.64 | 98.28 | 86.24 |
| XJYQ | 4474986 | 40.27 | 92.05 | 98.14 | 88.47 |
| XLSJ | 3211330 | 41.76 | 92.06 | 98.67 | 84.72 |
| XMEH | 5548506 | 40.03 | 92.41 | 98.53 | 89.37 |
| XMYH | 9354458 | 40.38 | 92.35 | 98.6 | 90.97 |
| YGBR | 8701480 | 40.87 | 92.22 | 99.42 | 92.18 |
| YH3 | 4944592 | 41.01 | 92.32 | 98.4 | 87.54 |
| YWG | 5920084 | 40.02 | 92.01 | 98.13 | 76.32 |
| YXX | 5008290 | 40.34 | 89.44 | 98.27 | 89.76 |
| ZL | 3404136 | 41.59 | 93.87 | 98.57 | 85.47 |

Q30 indicates the percentage of bases with Phred quality ≥30; Mapped% refers to total reads aligned to the reference genome; Properly mapped% denotes reads with correct pair orientation (for paired-end data).
